# Supplementary material
Source: MDPI journal article supplement (https://www.mdpi.com/2227-9717/11/9/2746)
Supplement: s1 [file s1]

# **Supplementary Materials**

## **Effect of Palmitic Acid on Tertiary Structure of Glycated Human Serum Albumin**

**Agnieszka Szkudlarek \***

Department of Physical Pharmacy, Faculty of Pharmaceutical Sciences in Sosnowiec, Medical University of Silesia in Katowice, 40-055 Katowice, Poland

\*Correspondence: [aszkuclarek@sum.edu.pl](mailto:aszkuclarek@sum.edu.pl); Tel.: +48-32-364-1581

**Table S1.** Absorbance of non-glycated (HSA); glycated and deffated (gHSA), and glycated in the presence of palmitic acid (PA) albumin at molar ratios of PA:gHSA 1.5:1 and PA:gHSA 3:1; protein concentration,  $5 \times 10^{-6}$  mol·L<sup>-1</sup>;  $\lambda_{\text{max}} = 279$  nm,  $\lambda = 330$  nm,  $\lambda = 360$  nm, and  $\lambda = 400$  nm.

| $5 \times 10^{-6}$ (mol·L <sup>-1</sup> ) | Absorbance (a.u.)                 |                      |                      |                      |
|-------------------------------------------|-----------------------------------|----------------------|----------------------|----------------------|
|                                           | $\lambda_{\text{max}} = 279$ (nm) | $\lambda = 330$ (nm) | $\lambda = 360$ (nm) | $\lambda = 400$ (nm) |
| HSA                                       | 0.097                             | 0.019                | 0.016                | 0.013                |
| gHSA                                      | 0.161                             | 0.081                | 0.065                | 0.047                |
| PA:gHSA 1.5:1                             | 0.090                             | 0.021                | 0.013                | 0.007                |
| PA:gHSA 3:1                               | 0.150                             | 0.059                | 0.047                | 0.037                |

**Table S2.** Absorbance of non-glycated (HSA); glycated and deffated (gHSA), and glycated in the presence of palmitic acid (PA) human serum albumin in molar ratio PA:gHSA 1.5:1 and PA:gHSA 3:1 for a wavelength of 412 nm and the percentage of free sulfhydryl groups [SH] %.

|               | <b>Abs<sub>412p</sub></b><br><b>(a.u.)</b> | <b>Abs<sub>412t</sub></b><br><b>(a.u.)</b> | <b>Abs<sub>412k</sub></b><br><b>(a.u.)</b> | <b>[SH]</b><br><b>(mol·L<sup>-1</sup>)</b> | <b>[SH]%</b> |
|---------------|--------------------------------------------|--------------------------------------------|--------------------------------------------|--------------------------------------------|--------------|
| HSA           | 0.022139                                   | 0.019295                                   | 0.009356                                   | $2.27 \times 10^{-6}$                      | 45.34        |
| gHSA          | 0.006691                                   | 0.007764                                   | 0.007917                                   | $0.46 \times 10^{-6}$                      | 9.20         |
| PA:gHSA 1.5:1 | 0.008253                                   | 0.009331                                   | 0.031669                                   | $0.99 \times 10^{-6}$                      | 19.91        |
| PA:gHSA 3:1   | 0.033796                                   | 0.034222                                   | 0.018337                                   | $1.12 \times 10^{-6}$                      | 22.46        |

**Table S3.** The position ( $\lambda_{\text{max}}$ ) of the maximum fluorescence ( $F_{\text{max}}$ ) and the shift of the maximum fluorescence emission ( $\Delta\lambda$ ) determined for non-glycated (HSA), glycated and deffated (gHSA), and glycated in the presence of palmitic acid (PA) human serum albumin in molar ratio PA:gHSA 1.5:1 and PA:gHSA 3:1;  $\lambda_{\text{ex}} = 290$  nm,  $\lambda_{\text{ex}} = 295$  nm and  $\lambda_{\text{ex}} = 300$  nm.

|               | $\lambda_{\text{ex}} = 290$ nm |                  | $\lambda_{\text{ex}} = 295$ nm |                  | $\lambda_{\text{ex}} = 300$ nm |                  | $\Delta\lambda$ (nm) |
|---------------|--------------------------------|------------------|--------------------------------|------------------|--------------------------------|------------------|----------------------|
|               | $\lambda_{\text{max}}$ (nm)    | $F_{\text{max}}$ | $\lambda_{\text{max}}$ (nm)    | $F_{\text{max}}$ | $\lambda_{\text{max}}$ (nm)    | $F_{\text{max}}$ |                      |
| HSA           | 330                            | 50.27            | 333                            | 22.24            | 335                            | 17.28            | 5                    |
| gHSA          | 326                            | 5.20             | 332                            | 4.66             | 346                            | 3.70             | 20                   |
| PA:gHSA 1.5:1 | 326                            | 4.72             | 332                            | 4.72             | 346                            | 3.79             | 20                   |
| PA:gHSA 3:1   | 327                            | 23.09            | 336                            | 10.81            | 360                            | 5.63             | 33                   |

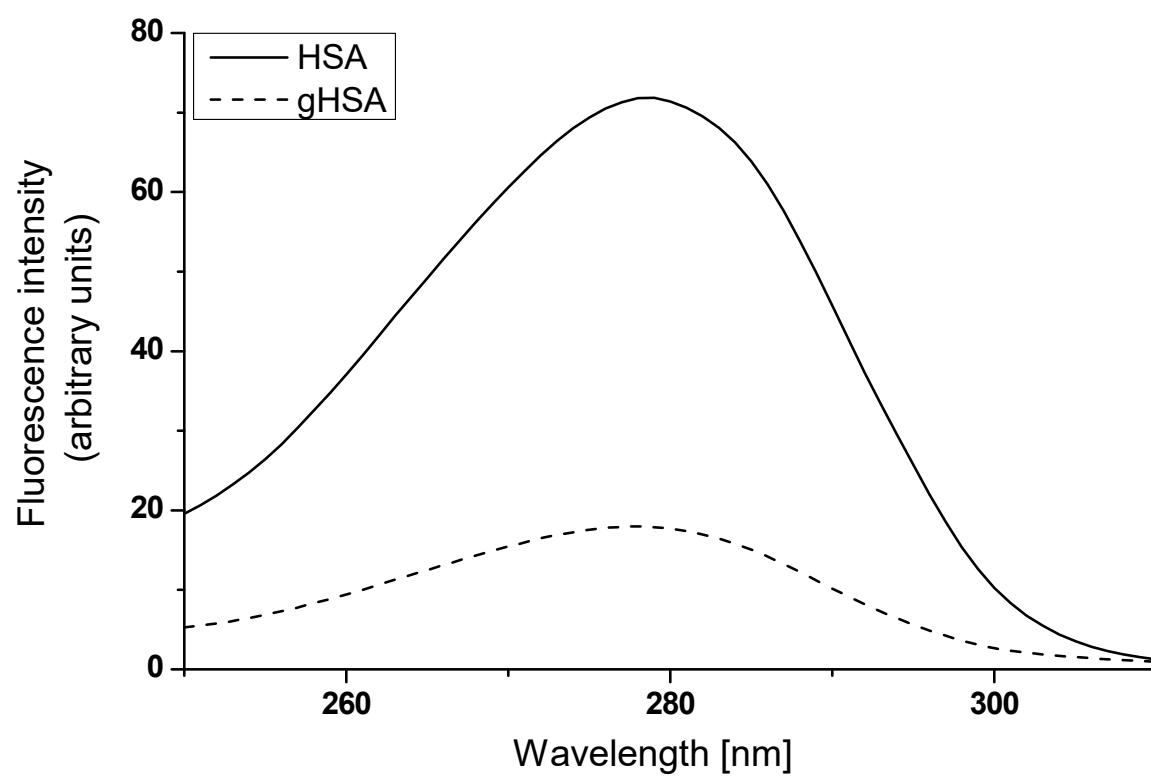

**Figure S1.** Excitation spectra of HSA and gHSA at  $5 \times 10^{-6} \text{ mol}\cdot\text{L}^{-1}$  concentration;  $t = 37^\circ\text{C}$ .

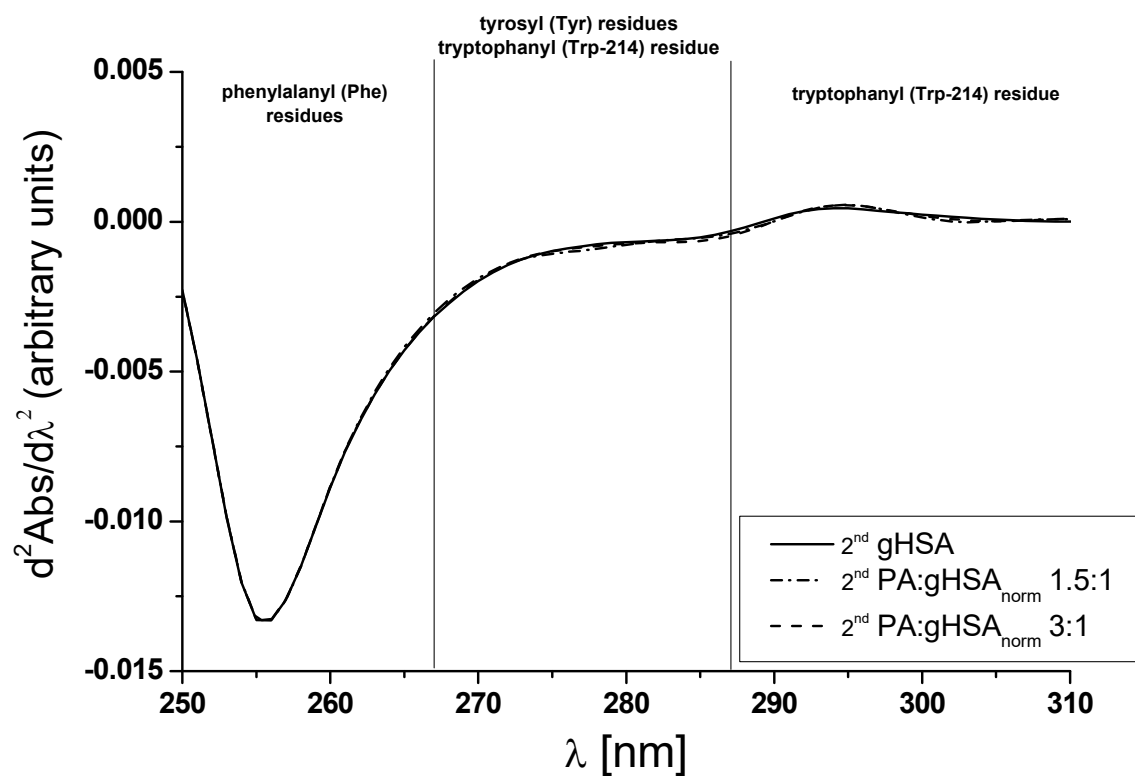

**Figure S2.** Second derivative of glycated, deffated (2<sup>nd</sup> gHSA) and glycated in the presence of palmitic acid (PA) serum albumin in molar ratio PA:gHSA 1.5:1 and PA:gHSA 3:1 (2<sup>nd</sup> PA:gHSA<sub>norm</sub> 1.5:1, 2<sup>nd</sup> PA:gHSA<sub>norm</sub> 3:1) absorption spectrum. Protein concentration,  $5 \times 10^{-6} \text{ mol}\cdot\text{L}^{-1}$ ;  $t = 37^\circ\text{C}$ .

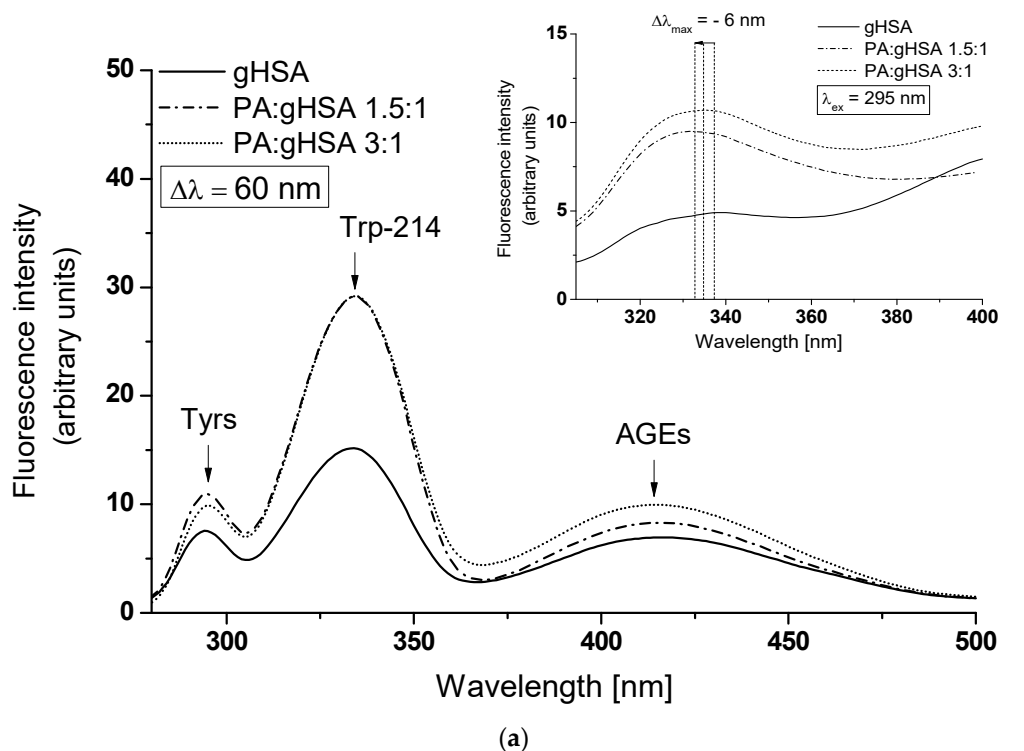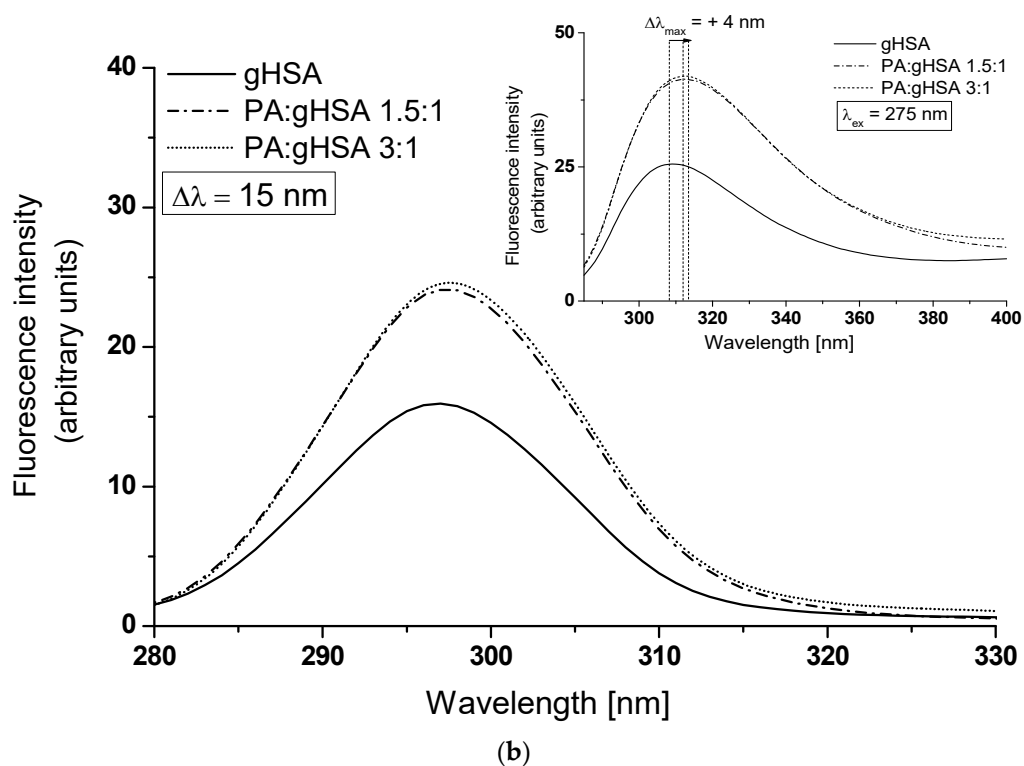

**Figure S3.** Main view: synchronous fluorescence spectra of glycated, deffated (gHSA) and glycated in the presence of palmitic acid (PA) human serum albumin in molar ratio PA:gHSA 1.5:1 and PA:gHSA 3:1 at  $5 \times 10^{-6} \text{ mol}\cdot\text{L}^{-1}$  concentration (a)  $\Delta\lambda = 60 \text{ nm}$  ( $\lambda_{\text{ex}} = 220\text{--}440 \text{ nm}$ ), (b)  $\Delta\lambda = 15 \text{ nm}$  ( $\lambda_{\text{ex}} = 265\text{--}305 \text{ nm}$ ). Insert: comparison of gHSA, PA:gHSA 1.5:1 and PA:gHSA 3:1 emission spectrum excited at (a)  $\lambda_{\text{ex}} = 295 \text{ nm}$  and (b)  $\lambda_{\text{ex}} = 275 \text{ nm}$ ;  $t = 37^\circ\text{C}$ .
